# Supplementary material
Source: HighWire-hosted journal article supplement (http://molpharm.aspetjournals.org/highwire/filestream/76369/field_highwire_adjunct_files/0/72744_Supplemental_Data_Jul_18.pdf)

**Article's title:** Valproic Acid Induces Monoamine Oxidase A via Akt/FoxO1 Activation

**Authors:** Jason Boyang Wu and Jean C. Shih

**Journal title:** Molecular Pharmacology

### **Legends for Supplemental Figures**

**Supplemental Fig. 1.** VPA activation of MAO A catalytic activity showed a similar increasing tendency within 24- and 48-h treatment periods. MAO A catalytic activity was determined in BE(2)C cells treated with 1 mM VPA for various times (12, 24, 36, 48, and 72 h) (mean  $\pm$  S.D., n=3). MAO A catalytic activity determined at the starting point of the treatment was set as 100%. Ethanol was used as a vehicle for VPA. \*\*,  $p < 0.01$ .

**Supplemental Fig. 2.** VPA activated MAO A catalytic activity in E18 rat primary cortical neurons. MAO A catalytic activity was determined in E18 rat primary cortical neurons treated with VPA at various concentrations (0.5 and 1 mM) for 24 h (mean  $\pm$  S.D., n=3). MAO A catalytic activity in cells treated with vehicle was set as 100%. Ethanol was used as a vehicle for VPA. \*\*,  $p < 0.01$ .

**Supplemental Fig. 3.** Sodium butyrate (SB) and trichostatin A (TSA) activated MAO A catalytic and promoter activities. A, B, MAO A catalytic activity was determined in BE(2)C cells treated with either 4 mM SB (A) or 50 nM TSA (B) for 24 h (mean  $\pm$  S.D., n=3). MAO A catalytic activity in cells treated with vehicle was set as 100%. C, D, MAO A 2-kb promoter-*luc* was transfected into BE(2)C cells, 18-24 h after transfection, cells were treated with 4 mM SB (C) or 50 nM TSA (D) for another 24 h followed by luciferase activity determination (mean  $\pm$  S.D., n=3). Activity of MAO A 2-kb *luc* under the treatment of vehicle was set as 100%. PBS and ethanol were used as a vehicle for SB and TSA, respectively. \*,  $p < 0.05$ ; \*\*,  $p < 0.01$ .

**Supplemental Figure 1**

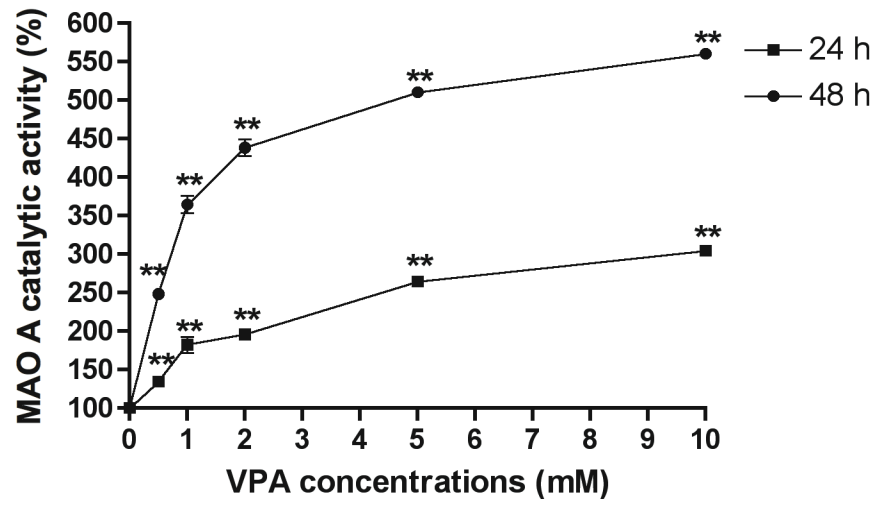

**Supplemental Figure 2**

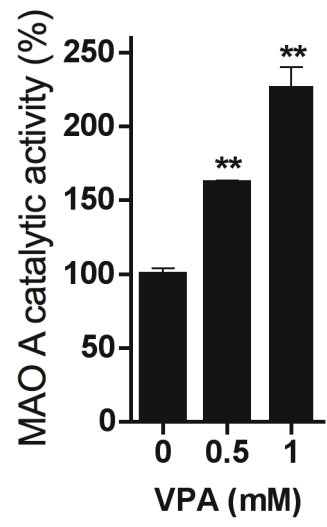

Supplemental Figure 3

**A**

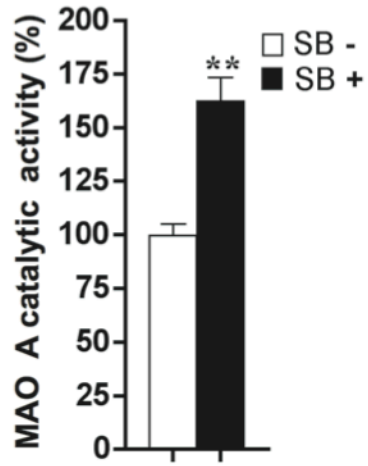

**B**

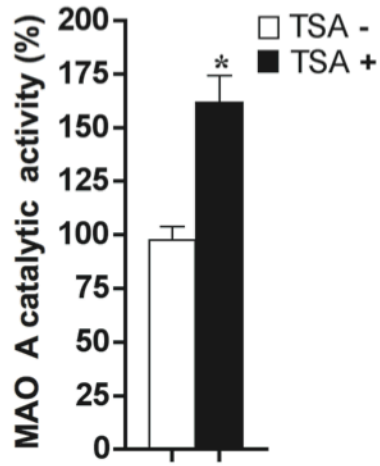

**C**

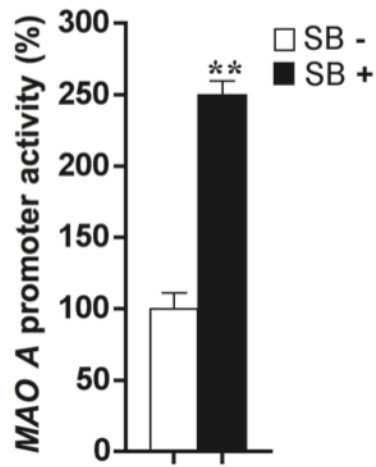

**D**

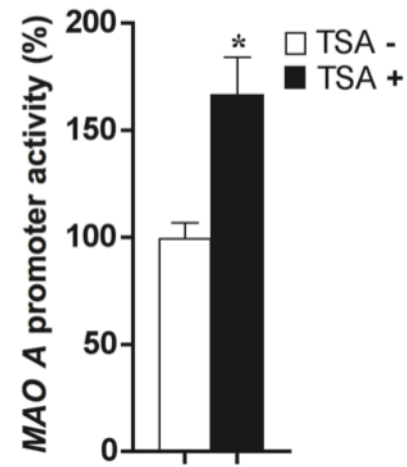

Supplement: 72744_Supplemental_Data_Jul_18.pdf [file 72744_Supplemental_Data_Jul_18.pdf]
